# Supplementary material
Source: PubMed Central journal article supplement (PMC4211456)
Supplement: rspb20141739supp1.pdf [file rspb20141739supp1.pdf]

# Supplementary Figures

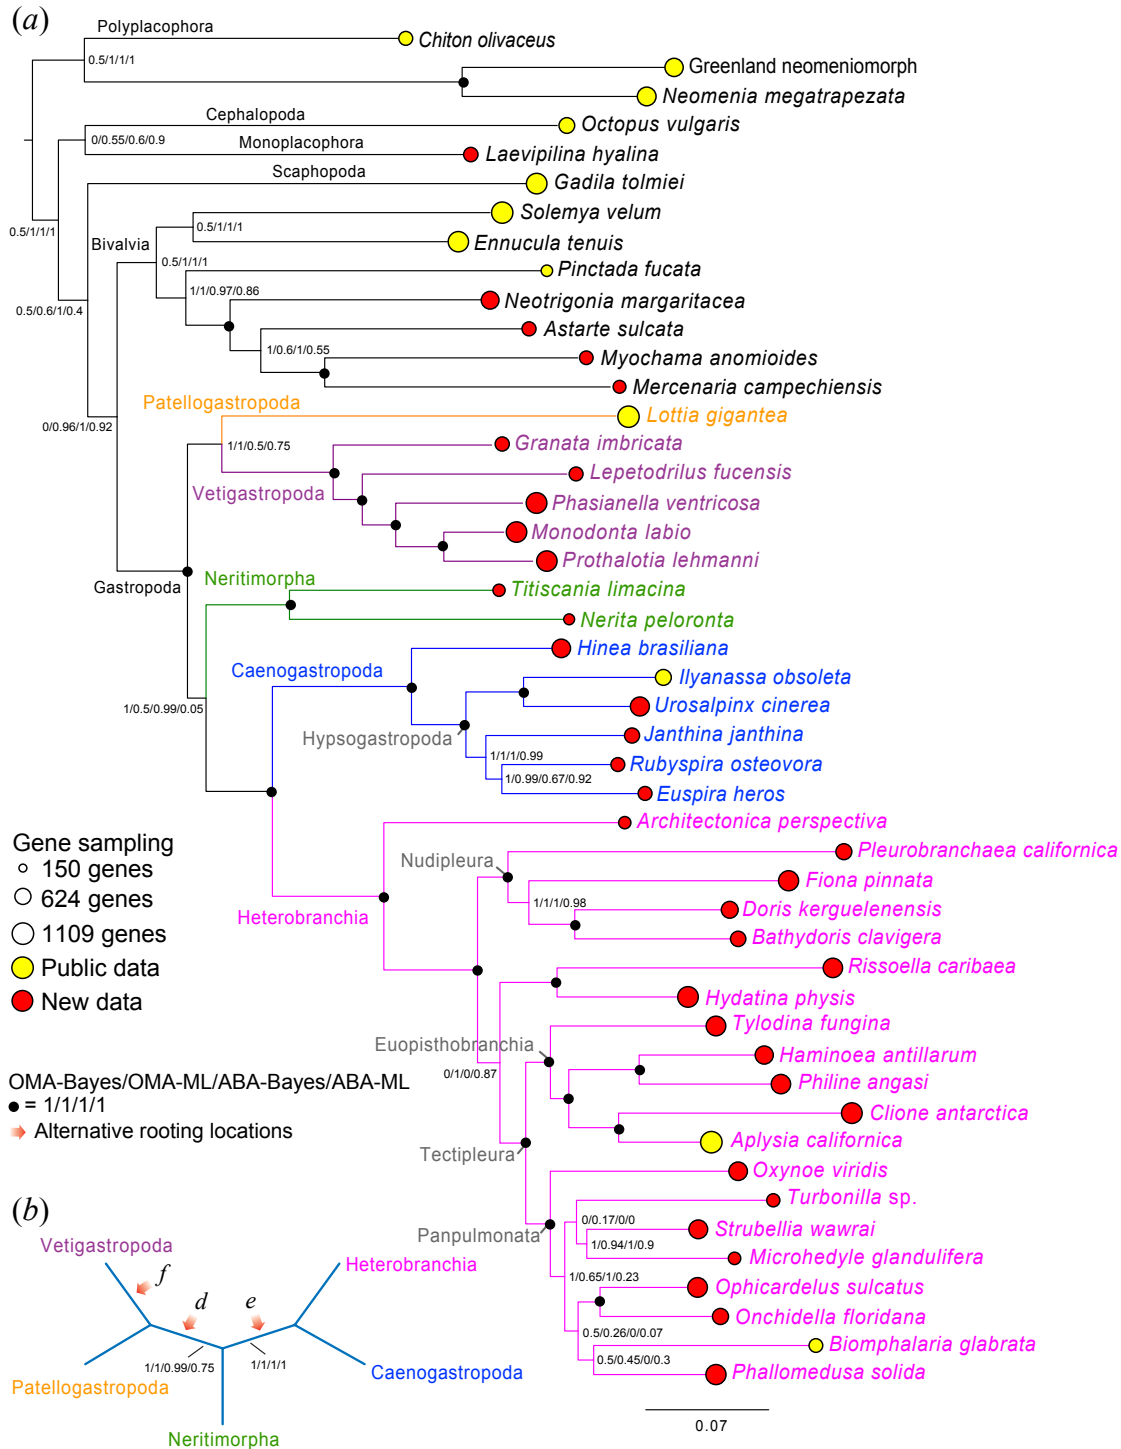

**Supplementary Figure 1.** Summary tree for analyses of Supermatrices 2. See Figure 3 legend for description of layout.

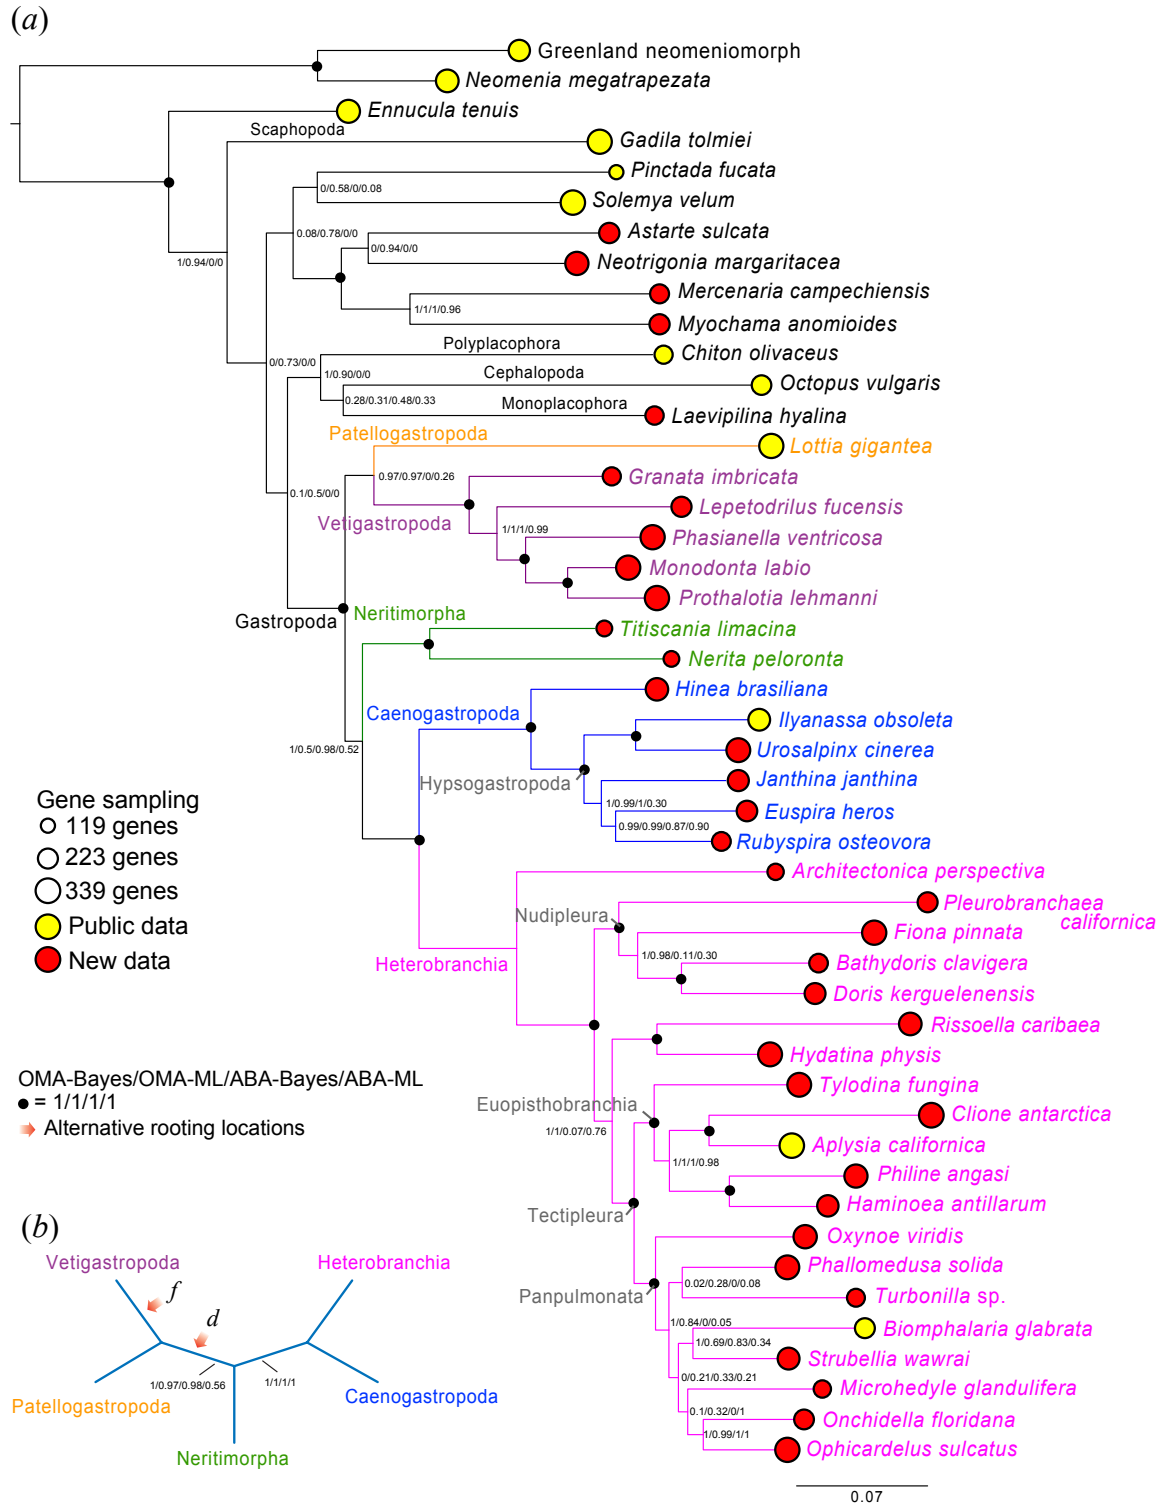

**Supplementary Figure 2.** Summary tree for analyses of Supermatrices 3. See Figure 3 legend for description of layout.

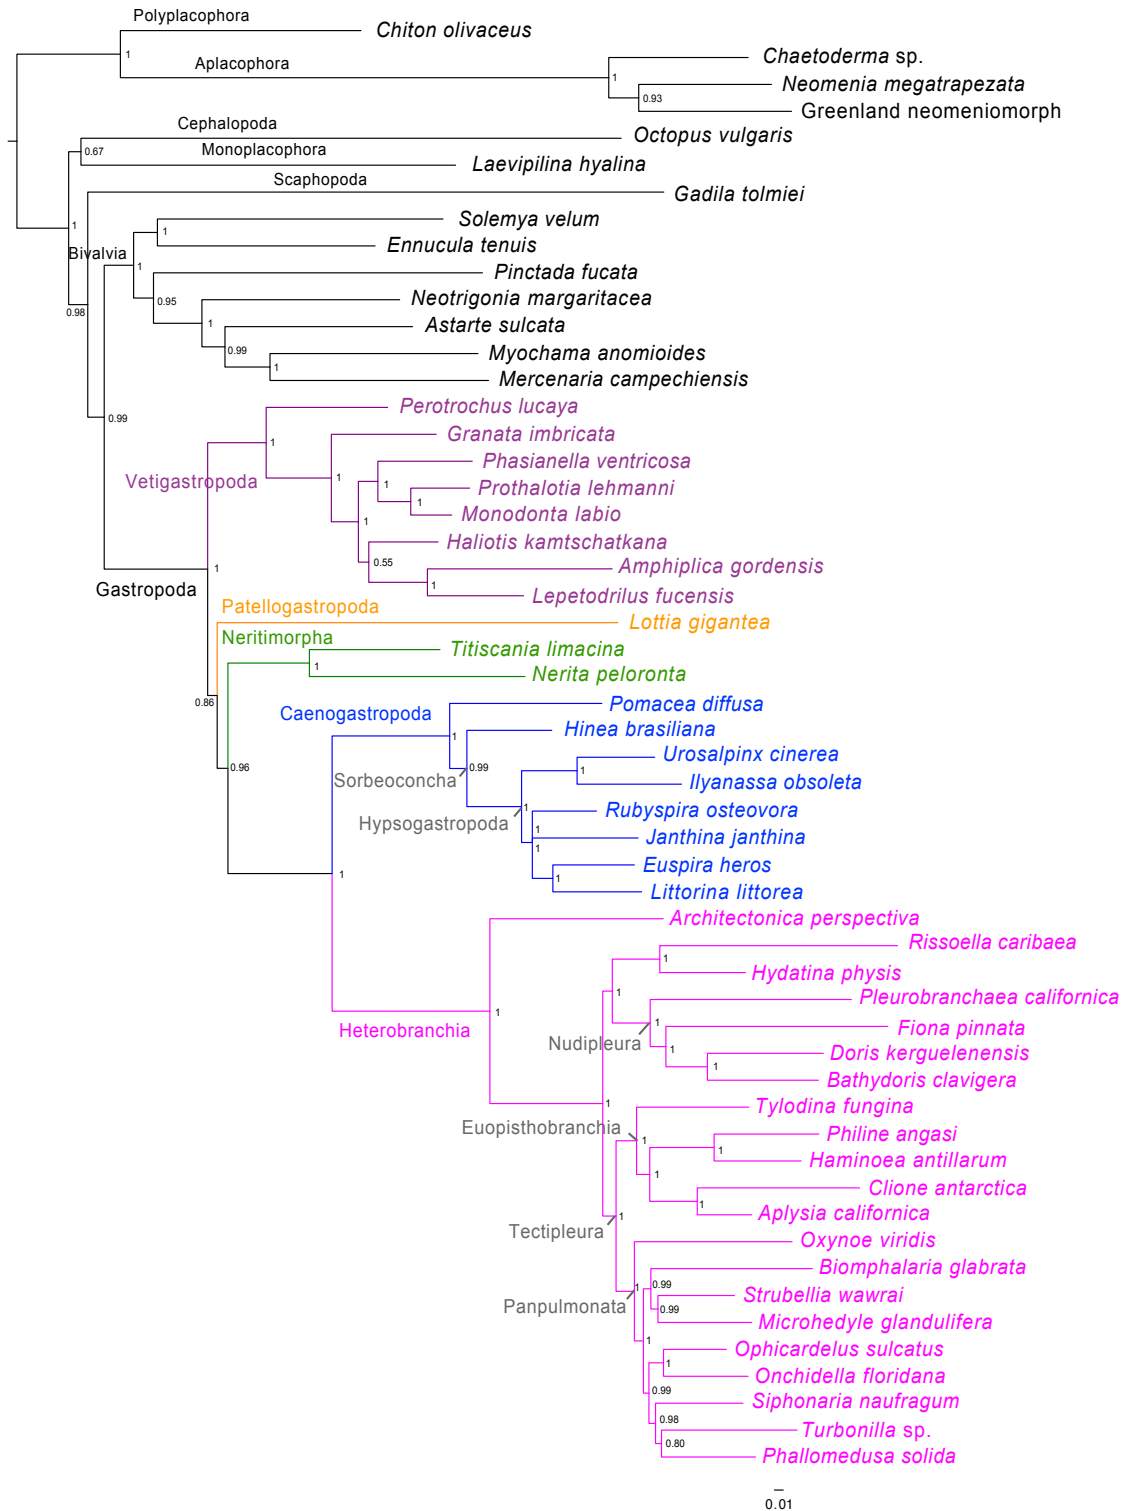

**Supplementary Figure 3.** Phylogram of the Bayesian analysis of ABA Supermatrix 1. Tree sets for other analyses are available at DataDryad.
